# Supplementary material for: Transgene stacking in potato using the GAANTRY system
Source: PubMed Central journal article supplement (PMC6659271; doi:10.1186/s13104-019-4493-8), 2019-07-25
Supplement: 13104_2019_4493_MOESM1_ESM.pdf [file 13104_2019_4493_MOESM1_ESM.pdf]

**Fig S1**

**Transgene copy number measurements in seven potato 10-stack events.**

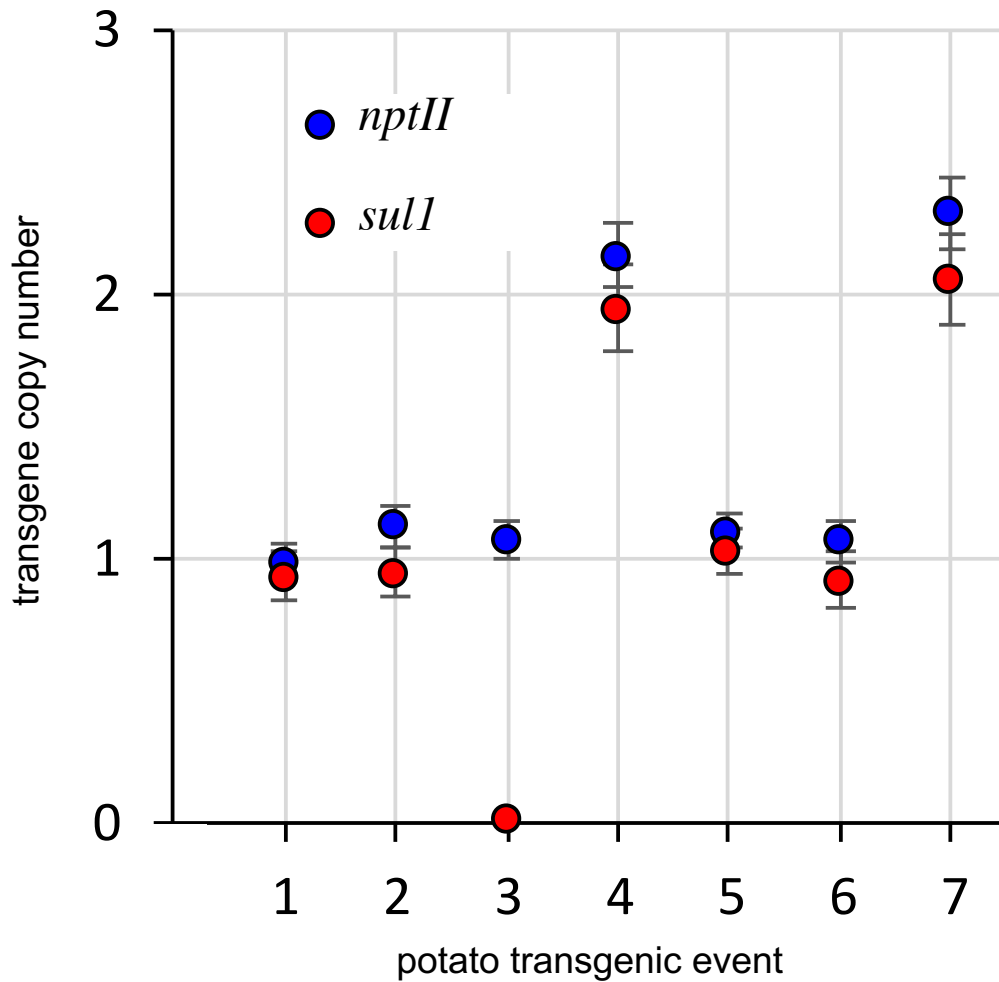

**Fig S1.** Transgene copy number measurements in seven potato 10-stack events. The *nptII* (blue) and *sull* (red) transgene copy number was measured using ddPCR. The error values are Poisson 95% confidence intervals calculated by the QuantaSoft™ software.
