# Supplementary material for: Transgene stacking in potato using the GAANTRY system
Source: PubMed Central journal article supplement (PMC6659271; doi:10.1186/s13104-019-4493-8), 2019-07-25
Supplement: 13104_2019_4493_MOESM2_ESM.pdf [file 13104_2019_4493_MOESM2_ESM.pdf]

**Table S1**  
**Ten-stack cargo sequences in donor plasmids.**

| Stack # | Transcriptional Unit/Cargo | Phenotype                        | Transcriptional Unit |                                          |                         | TU Size (Kb) | GenBank Accession |
|---------|----------------------------|----------------------------------|----------------------|------------------------------------------|-------------------------|--------------|-------------------|
|         |                            |                                  | Promoter             | CDS                                      | Terminator              |              |                   |
|         |                            |                                  | 1                    | sul1                                     | sulfadiazine resistance |              |                   |
| 2       | Luc                        | luciferase activity              | StUbi 409S           | LUC, Firefly luciferase                  | nosT                    | 4.0          | MG687277          |
| 3       | GFP                        | green florescence                | StUbi7               | eGFP, enhanced Green Florescence Protein | nosT                    | 3.0          | MG687278          |
| 4       | bar                        | herbicide resistance             | Nos                  | bar, bialaphos resistance                | nosT                    | 1.7          | MG687279          |
| 5       | GUS                        | $\beta$ -glucuronidase acitivity | PrUbi                | uidA, $\beta$ -glucuronidase             | nosT                    | 4.4          | MG687280          |
| 6       | TBS                        | enhancer blocking insulator      | N/A                  | N/A                                      | N/A                     | 2.2          | MG687281          |
| 7       | MYBA                       | anthocyanin accumulation         | AtHTH                | Citrus sinsensis MybA                    | nosT                    | 3.4          | MG687282          |
| 8       | TBS                        | enhancer blocking insulator      | N/A                  | N/A                                      | N/A                     | 2.2          | MG687281          |
| 9       | tdTom                      | red florescence                  | CaMV 35S             | codon optimized tdTomatoER               | nosT/35St               | 3.0          | MG687283          |
| 10      | nptII                      | kanamycin resistance             | AtUbq10              | nptII, neomycin phosphotransferase II    | Ubq10t                  | 2.3          | MG687284          |

\* N/A not applicable

Abbreviations: CaMV35S (double enhanced cauliflower mosaic virus 35S promoter); StUbi 409S (Solanum tuberosum ubiquitin 409S promoter); StUbi7 (Solanum tuberosum ubiquitin 7 promoter); Nos (nopaline synthase promoter); PrUbi1 (Pinus radiata ubiquitin 1 promoter); AtHTH (Arabidopsis thaliana HOTHEAD promoter); AtUbq10 (Arabidopsis thaliana ubiquitin 10 promoter); TBS (Petunia hybrida Transformation Booster Sequence); CaMV35St (cauliflower mosaic virus 35S 3' terminator) nosT (nopaline synthase 3' terminator); nosT/35St (nopaline synthase and CaMV35S double terminator); Ubq10t (Arabidopsis thaliana ubiquitin 10 3' terminator)
