# Supplementary material for: Transgene stacking in potato using the GAANTRY system
Source: PubMed Central journal article supplement (PMC6659271; doi:10.1186/s13104-019-4493-8), 2019-07-25
Supplement: 13104_2019_4493_MOESM3_ESM.pdf [file 13104_2019_4493_MOESM3_ESM.pdf]

**Table S2**  
**Primers and probes used for transgene detection**

| Name                     | Sequence 5'-3'                                  | Annealing temperature (°C) | Template    | Amplicon size (bp) |
|--------------------------|-------------------------------------------------|----------------------------|-------------|--------------------|
| <b>HTHp65 F60</b>        | CAAAAGCCACATAAGAAGTTGATGCAGAAGC                 | 60                         | mybA        | 1795               |
| <b>MoroMybA R60</b>      | CGATACTAGTCTTACTTTGCATTGAGAAGATCCC              |                            |             |                    |
| <b>GUSi F5</b>           | GGAGTATTGCCAACGAACCG                            | 55                         | uidA        | 496                |
| <b>GUSi R6</b>           | CGAGTGAAGATCCCTTTCTTG                           |                            |             |                    |
| <b>NOSp ERV F59</b>      | CAGTGATATCATACATGAGAATTAAGGGAGTCACGTT<br>ATGACC | 60                         | bar         | 1387               |
| <b>StUbi7pro 90</b>      | GACCAAATCTTGTCATCCTCATCAACAAAATAATG             |                            |             |                    |
| <b>StUbi7p 100 F60</b>   | GGCTAAGATCCAGGATAAGGAAGGGATTCC                  | 60                         | eGFP        | 1482               |
| <b>409s pro 1400 R60</b> | GCAAATTAGGGTATAATACTCGTTGATAATCGCACTT<br>TAATC  |                            |             |                    |
| <b>RTAC LB3 F61</b>      | GGACTGATGGGCTGCCTGTATCG                         | 60                         | LB backbone | 550                |
| <b>SulI830 F60</b>       | CCAGAGACCGAGGGTTAGATCATGC                       |                            |             |                    |
| <b>TO43 Inv-2 F</b>      | CTCCATTACACATTCCTCCC                            | 55                         | StInv2      | 128                |
| <b>TO447 Inv-2 R</b>     | GGTTGTTGAGGATCGGAAAG                            |                            |             |                    |
| <b>TO435 Inv-2 Probe</b> | TCTCCGGCATTTCCTCTCCTCT                          |                            | FAM Probe   |                    |
| <b>AB099 nptII F</b>     | CCGGCTACCTGCCCATTC                              | 60                         | nptII       | 79                 |
| <b>AB100 nptII R</b>     | CGACAAGACCGGCTTCCAT                             |                            |             |                    |
| <b>AB101 nptII Probe</b> | AACATCGCATCGAGCGAGCACGT                         |                            | HEX Probe   |                    |
| <b>SulI F</b>            | CTGTCCGATCAGATGCAC                              | 54                         | sul1        | 139                |
| <b>SulI R</b>            | CCTCAGCAATATCGGGATAG                            |                            |             |                    |
| <b>SulI Probe</b>        | TTTCAATCGACAGCTTCCAACCGG                        |                            | HEX Probe   |                    |
